# Supplementary material for: A Clinicopathological and Prognostic Analysis of PD-L2 Expression in Surgically Resected Primary Lung Squamous Cell Carcinoma
Source: Springer Nature journal article supplement (doi:10.1245/s10434-019-07257-3), 2019-02-27
Supplement: MOESM1 [file 16513908]

**Supplementary Table 1. The antibodies used in this study**

| Target molecule | Antibody | Dilution |
| --- | --- | --- |
| PD-L1 | rabbit monoclonal, clone SP142, Spring Bioscience, Ventana, Tucson, AZ, USA | 1:100 |
| PD-L2 | mouse monoclonal, clone 176611, R&D Systems, Minneapolis, MN, USA | 1:200 |
| CD3 | mouse monoclonal, clone PS1, Nichirei Biosciences, Tokyo, Japan | pre-diluted |
| CD4 | mouse monoclonal, clone 4B12, DakoCytomation, Carpinteria, CA, USA | 1:100 |
| CD8 | mouse monoclonal, clone 1A5, BioGenex, Fremont, CA, USA | 1:100 |

PD-L1, programmed death-ligand 1; PD-L2, programmed death-ligand 2; CD3, cluster of differentiation 3; CD4, cluster of differentiation 4; CD8, cluster of differentiation 8.
