# Supplementary material for: A Clinicopathological and Prognostic Analysis of PD-L2 Expression in Surgically Resected Primary Lung Squamous Cell Carcinoma
Source: Springer Nature journal article supplement (doi:10.1245/s10434-019-07257-3), 2019-02-27
Supplement: MOESM2 [file 16513908]

**Supplementary Table 2. Clinicopathological characteristics of the 211 primary lung squamous cell carcinoma patients**

| Variables | No. of patients (%) |
| --- | --- |
| Age (years) | 69 (39–87) |
| Sex  Male  Female | 175 (82.9)  36 (17.1) |
| Smoking status (pack years)  <30  ≥30 | 32 (15.2)  179 (84.8) |
| Surgical procedure  Lobectomy  Bilobectomy  Pneumonectomy  Sublober resection | 133 (63.0)  30 (14.2)  21 (10.0)  27 (12.8) |
| Histological type  Non-keratinizing  Keratinizing | 37 (17.5)  174 (82.5) |
| T status  T1  T2  T3–T4 | 59 (28.0)  124 (58.7)  28 (13.3) |
| N status  N0  N1  N2 | 153 (72.5)  43 (20.4)  15 (7.1) |
| Pathological stage  I  II  III | 114 (54.0)  73 (34.6)  24 (11.4) |
| Pleural invasion (pl)  Absent  Present | 154 (73.0)  57 (27.0) |
| Lymphatic invasion (ly)  Absent  Present | 179 (84.8)  32 (15.2) |
| Vascular invasion (v)  Absent  Present | 142 (67.3)  69 (32.7) |
