# Supplementary material for: A Clinicopathological and Prognostic Analysis of PD-L2 Expression in Surgically Resected Primary Lung Squamous Cell Carcinoma
Source: Springer Nature journal article supplement (doi:10.1245/s10434-019-07257-3), 2019-02-27
Supplement: MOESM5 [file 16513908]

**Supplementary Table 5. Univariate and multivariate analyses of overall survival in primary lung squamous cell carcinoma patients with PD-L1 negative expression**

|  | Univariate analysis | | |  | Multivariate analysis | | |
| --- | --- | --- | --- | --- | --- | --- | --- |
| Factor | HR  (95% CI) |  | *P* value |  | HR  (95% CI) |  | *P* value |
| Age  ≥69 / <69 | 1.55  (0.77–3.18) |  | 0.2191 |  | 3.26  (1.42–7.74) |  | 0.0052 |
| Sex  Female / Male | 1.55  (0.61–3.44) |  | 0.3300 |  |  |  |  |
| Smoking status (pack years)  <30 / ≥30 | 1.64  (0.61–3.80) |  | 0.3032 |  |  |  |  |
| Histological type  Non-keratinizing / Keratinizing | 1.41  (0.56–3.08) |  | 0.4417 |  |  |  |  |
| Stage  ≥II / I | 3.04  (1.52–6.28) |  | 0.0017 |  | 2.68  (1.23–5.94) |  | 0.0131 |
| pl  Present / Absent | 1.70  (0.80–3.45) |  | 0.1631 |  |  |  |  |
| ly  Present / Absent | 4.23  (1.90–8.82) |  | 0.0008 |  | 5.05  (1.98–12.6) |  | 0.0010 |
| v  Present / Absent | 1.68  (0.80–3.39) |  | 0.1672 |  |  |  |  |
| PD-L2  Negative / Positive | 1.89  (0.88–3.83) |  | 0.1006 |  |  |  |  |
| CD3  Low / High | 1.18  (0.59–2.37) |  | 0.6408 |  |  |  |  |
| CD4  Low / High | 3.02  (1.38–7.57) |  | 0.0049 |  | 3.71  (1.53–10.1) |  | 0.0031 |
| CD8  High / Low | 0.94  (0.41–1.95) |  | 0.8690 |  | 2.78  (1.07–6.75) |  | 0.0359 |

pl, pleural invasion; ly, lymphatic invasion; v, vascular invasion; PD-L1, programmed death-ligand 1; PD-L2, programmed death-ligand 2; CD3, cluster of differentiation 3; CD4, cluster of differentiation 4; CD8, cluster of differentiation 8; HR, hazard ratio; CI, confidence interval.
